# Supplementary material
Source: Royal Society of Chemistry journal article supplement (doi:10.1039/d6cc02185a)
Supplement: d6cc02185a1.pdf [file d6cc02185a1.pdf]

Electronic Supplementary Information

**Planar tetracoordinate carbon in boron-based cluster  $\text{CB}_4\text{S}_6$   
stabilized by peripheral bridging sulfur atoms**

Cheng-Kai Liang, Guojuan Zhang and Rui Sun \*

<sup>1</sup> Basic science Department, Shanxi Agricultural University, 1 Mingxian South Road, Jinzhong, Shanxi, 030801, People's Republic of China.

\*To whom correspondence should be addressed.

E-mail: sunrui@sxau.edu.cn.

**Contents**

Computational methods

**Table S1.** Relative energies ( $\Delta E$ ) between the global minimum (**1**) of  $\text{CB}_4\text{S}_6$  and its second lowest-lying isomer (**1a**) at different theoretical levels.

**Table S2.** T1-Diagnostic values for the lowest-lying isomers of  $\text{CB}_4\text{S}_6$  shown in Fig. 1.

**Fig. S1.** AdNDP view of chemical bonding in the **1a** with occupation numbers (ONs) indicated.

**Fig. S2.** Nucleus independent chemical shifts (NICSs) for **1**. NICS(0), shown in black, is calculated at the center of a triangle. NICS(1), shown in red, is calculated at 1 Å above the center of a triangle and above the C center.

**Fig. S3.** Optimized structures of **1** and its isomers with ptB at the B2PLYP-D3(BJ)/aug-cc-pVTZ level. The relative energies ( $\Delta E$ , in kcal/mol) are reported at the CCSD(T) +  $\text{ZPE}_{\text{B2PLYP-D3(BJ)}}$  level.

**Fig. S4.** Optimized structures of **1** and its five low-lying isomers (in addition to those shown in Fig. 1) at the B2PLYP-D3(BJ)/aug-cc-pVTZ level. The relative energies ( $\Delta E$ , in kcal/mol) are reported at the CCSD(T) +  $\text{ZPE}_{\text{B2PLYP-D3(BJ)}}$  level.

**Fig. S5.** RMSD vs time for BOMD simulations of **1a** at the PBE/DZVP level and at 298, 500, and 1000 K.

**Fig. S6.** Energy profiles for isomerization from **1** to **1a** via the TS. The relative energies (in kcal/mol) are compared at the CCSD(T) +  $\text{ZPE}_{\text{B2PLYP-D3(BJ)}}$  level.

**Fig. S7** Optimized structures of  $[\mathbf{1}\cdot\text{N}_2]$  and  $[\mathbf{1a}\cdot\text{N}_2]$  at the B2PLYP-D3(BJ)/aug-cc-pVTZ level and the corresponding binding energies.

Cartesian Coordinates for the structures.

### Computational methods

The designed  $\text{CB}_4\text{S}_6$  cluster was optimized at both the B3LYP/aug-cc-pVTZ and B2PLYP-D3(BJ)<sup>2</sup>/aug-cc-pVTZ levels, yielding nearly identical structures and vibrational frequencies. Furthermore, the wavefunction of the  $\text{CB}_4\text{S}_6$  cluster was demonstrated to be stable at both computational levels. The potential energy surfaces (PESs) searches for the  $\text{CB}_4\text{S}_6$  cluster were explored using the combination of stochastic search algorithm<sup>3</sup> and the Basin-hopping algorithm<sup>4</sup>. Both singlet and triplet states were considered during the search. Based on the energy ordering of the randomly generated initial structures (optimized at the PBE<sup>5</sup>/DZVP<sup>6</sup> level), the 15 lowest isomers were calculated at the B2PLYP-D3(BJ)/aug-cc-pVTZ level. Among these, the 10 lowest isomers were subsequently refined at the CCSD(T)/aug-cc-pVTZ level. The relative energies of the isomers were compared based on the CCSD(T)/aug-cc-pVTZ energies plus the B2PLYP-D3(BJ)/aug-cc-pVTZ zero-point energy corrections. To investigate the dynamic stability, Born-Oppenheimer molecular dynamics (BOMD) simulations were carried out at the PBE/DZVP level using the CP2K package<sup>7</sup>. Furthermore, the adaptive natural density partitioning (AdNDP)<sup>8</sup> analyses were performed using the AdNDP program<sup>9</sup> to discuss chemical bonding. Nucleus independent chemical shift (NICS)<sup>10</sup> calculations were done to assess  $\pi/\sigma$  aromaticity. Vertical detachment energies (VDEs) and vertical electron affinities (VEAs) were calculated using the outer valence Green's function (OVGF) procedure at the OVGF/aug-cc-pVTZ level.<sup>11</sup> The cross sections of NICS (CS-NICS) were generated with the Multiwfn 3.8 code,<sup>12</sup> CCSD(T) calculations were carried out using the MolPro 2012.1 package,<sup>13</sup> and all other calculations were performed using the Gaussian 16 package.<sup>14</sup>

### Reference

- 1 S. Grimme, *J. Chem. Phys.*, 2006, **124**, 034108.
- 2 (a) S. Grimme, J. Antony, S. Ehrlich and H. Krieg, *J. Chem. Phys.*, 2010, **132**, 154104; (b) S. Grimme, S. Ehrlich and L. Goerigk, *J. Comput. Chem.*, 2011, **32**, 1456–1465.
- 3 (a) M. Saunders, *J. Comput. Chem.*, 2004, **25**, 621–626; (b) P. P. Bera, K. W. Sattelmeyer, M. Saunders, H. F. Schaefer and P. v. R. Schleyer, *J. Phys. Chem. A*, 2006, **110**, 4287–4290.
- 4 D. J. Wales and H. A. Scheraga, *Science*, 1999, **285**, 1368–1372.
- 5 J. P. Perdew, K. Burke and M. Ernzerhof, *Phys. Rev. Lett.*, 1996, **77**, 3865–3868.

- 6 J. VandeVondele and J. Hutter, *J. Chem. Phys.*, 2007, **127**, 114105.
- 7 T. D. Kühne and J. Hutter, *J. Chem. Phys.*, 2020, **152**, 194103.
- 8 D. Y. Zubarev and A. I. Boldyrev, *Phys. Chem. Chem. Phys.*, 2008, **10**, 5207–5217.
- 9 The AdNDP program was downloaded freely at <http://ion.chem.usu.edu/~boldyrev/adndp.php>.
- 10 (a) P. v. R. Schleyer, C. Maerker, A. Dransfeld, H. J. Jiao and N. Hommes, *J. Am. Chem. Soc.*, 1996, **118**, 6317–6318; (b) Z. Chen, C. S. Wannere, C. Corminboeuf, R. Puchta and P. v. R. Schleyer, *Chem. Rev.*, 2005, **105**, 3842–3888.
- 11 J. V. Ortiz, V. G. Zakrzewski and O. Dolgounircheva, *Conceptual Perspectives in Quantum Chemistry*, Kluwer Academic, 1997.
- 12 T. Lu and F. W. Chen, Multiwfn: A Multifunctional Wavefunction Analyzer. *J. Comput. Chem.*, 2012, **33**, 580–592.
- 13 H. J. Werner, *et al.* in MolPro 2012.1, University College Cardiff Consultants Limited, Cardiff U.K., 2012.
- 14 M. J. Frisch, *et al.* *Gaussian 16 Rev. A.03*, Wallingford, CT, 2016.

**Table S1.** Relative energies ( $\Delta E$ ) between the global minimum (**1**) of  $\text{CB}_4\text{S}_6$  and its second lowest-lying isomer (**1a**) at different theoretical levels.

| Theoretical levels                             | $\Delta E$ (kcal/mol) |
|------------------------------------------------|-----------------------|
| CCSD(T)/aug-cc-pVTZ//B3LYP/aug-cc-pVTZ         | 4.6                   |
| CCSD(T)/aug-cc-pVTZ//TPSSh/aug-cc-pVTZ         | 4.6                   |
| CCSD(T)/aug-cc-pVTZ//PBE0-D3(BJ)/aug-cc-pVTZ   | 4.7                   |
| CCSD(T)/def2-TZVPP//PBE0-D3(BJ)/def2-TZVPP     | 4.5                   |
| CCSD(T)/aug-cc-pVDZ//B2PLYP-D3(BJ)/aug-cc-pVDZ | 4.5                   |
| CCSD(T)/aug-cc-pVQZ//B2PLYP-D3(BJ)/aug-cc-pVQZ | 4.5                   |

**Table S2.** T1-Diagnostic values for the lowest-lying isomers of  $\text{CB}_4\text{S}_6$  shown in Fig. 1.

| Systems       | <b>1</b> | <b>1a</b> | <b>1b</b> | <b>1c</b> | <b>1d</b> |
|---------------|----------|-----------|-----------|-----------|-----------|
| T1 Diagnostic | 0.018    | 0.018     | 0.018     | 0.018     | 0.019     |

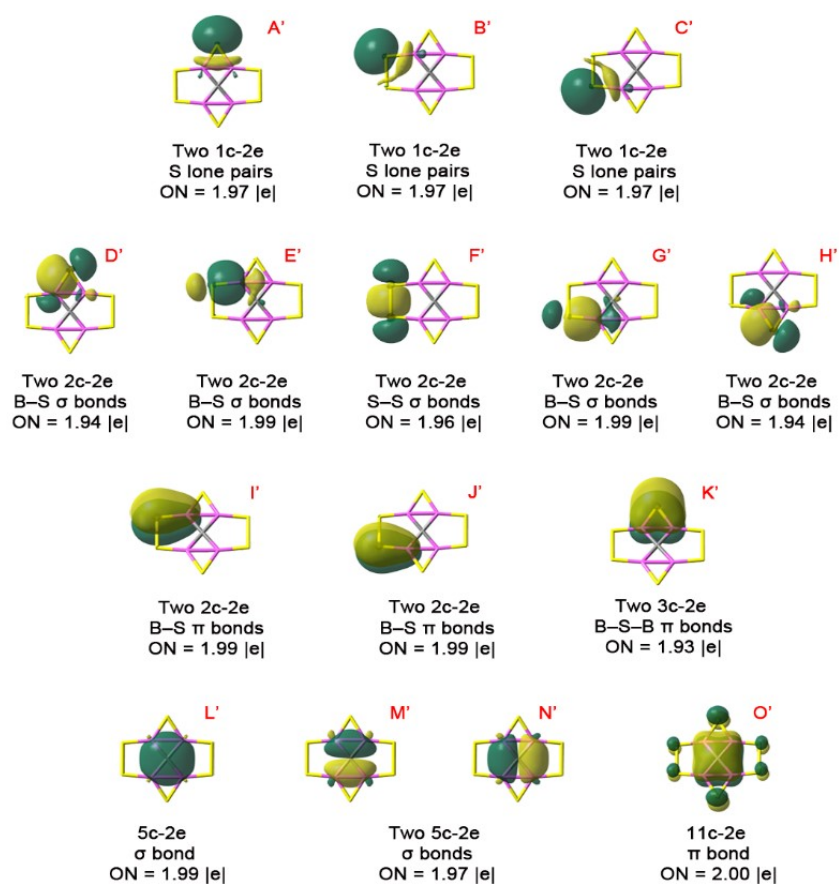

**Fig. S1** AdNDP view of chemical bonding in the **1a** with occupation numbers (ONs) indicated.

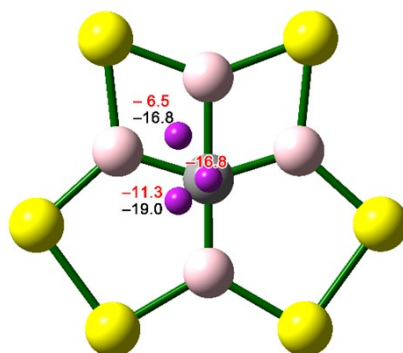

**Fig. S2** Nucleus independent chemical shifts (NICSSs) for the  $\text{CB}_4\text{S}_6$  cluster. NICS (0), shown in black, is calculated at the center of a triangle. NICS (1), shown in red, is calculated at 1 Å above the center of the triangle and above the C center.

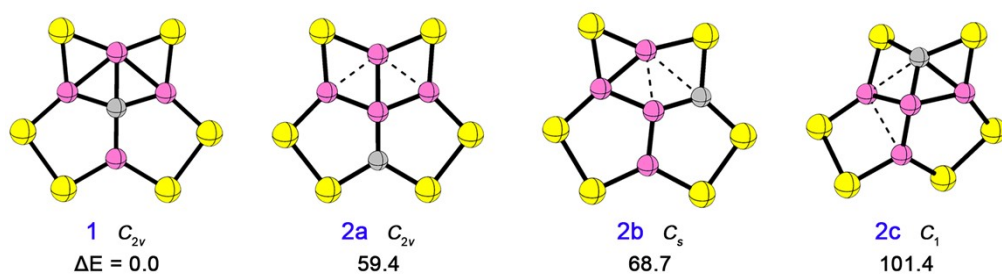

**Fig. S3** Optimized structures of  $CB_4S_6$  containing ptC or ptB at the B2PLYP-D3(BJ)/aug-cc-pVTZ level and the relative energies ( $\Delta E$ , in kcal/mol) are reported at the CCSD(T) +  $ZPE_{B2PLYP-D3(BJ)}$  level.

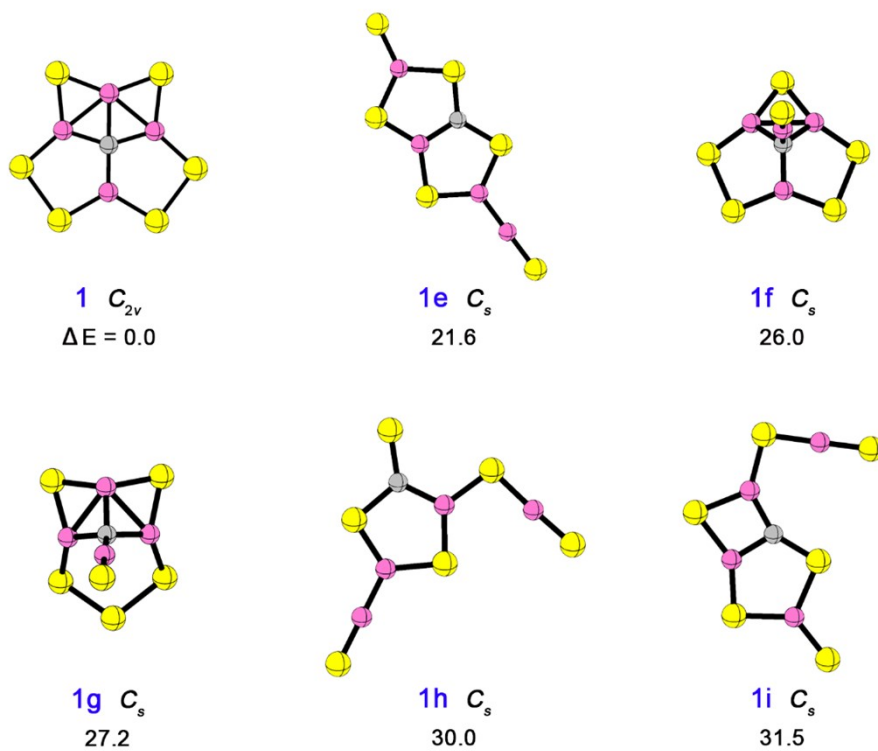

**Fig. S4** Optimized structures of **1** and its five low-lying isomers (in addition to those shown in Fig. 1) at the B2PLYP-D3(BJ)/aug-cc-pVTZ level. The relative energies ( $\Delta E$ , in kcal/mol) are reported at the CCSD(T) +  $ZPE_{B2PLYP-D3(BJ)}$  level.

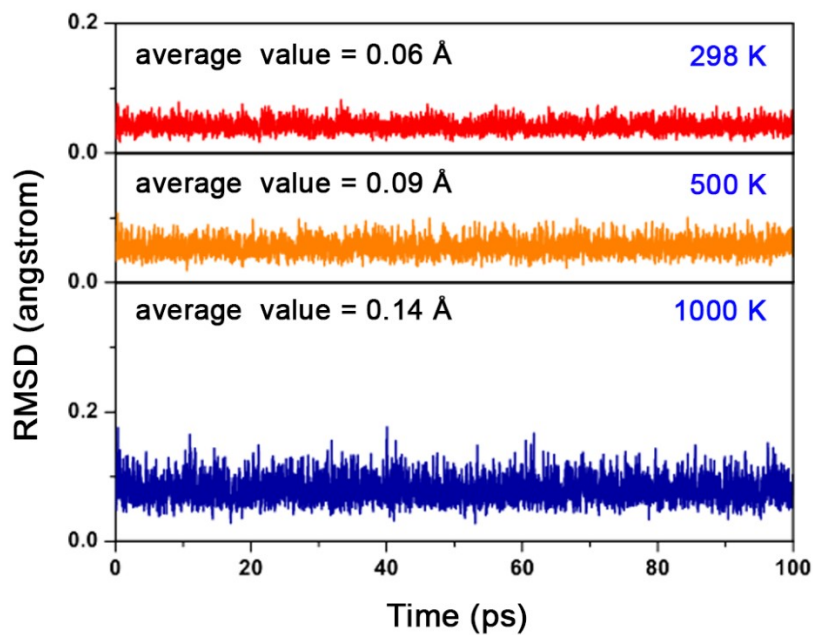

**Fig. S5** RMSD vs time for BOMD simulations of **1a** at the PBE/DZVP level and at 298, 500, and 1000 K.

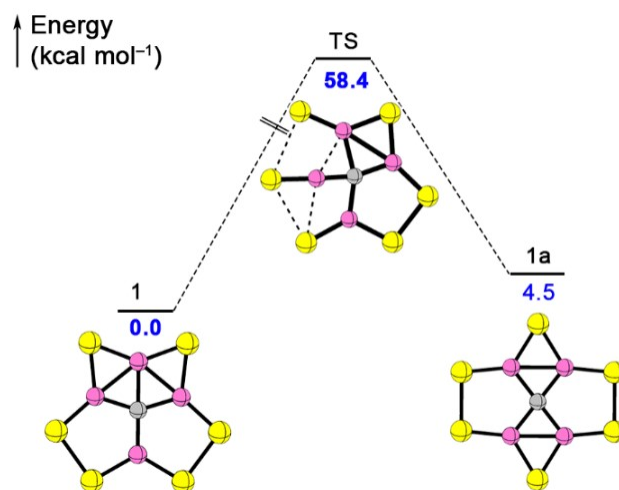

**Fig. S6** Energy profiles for isomerization from **1** to **1a** via the TS. The relative energies (in kcal/mol) are compared at the CCSD(T) + ZPE<sub>B2PLYP-D3(BJ)</sub> level.

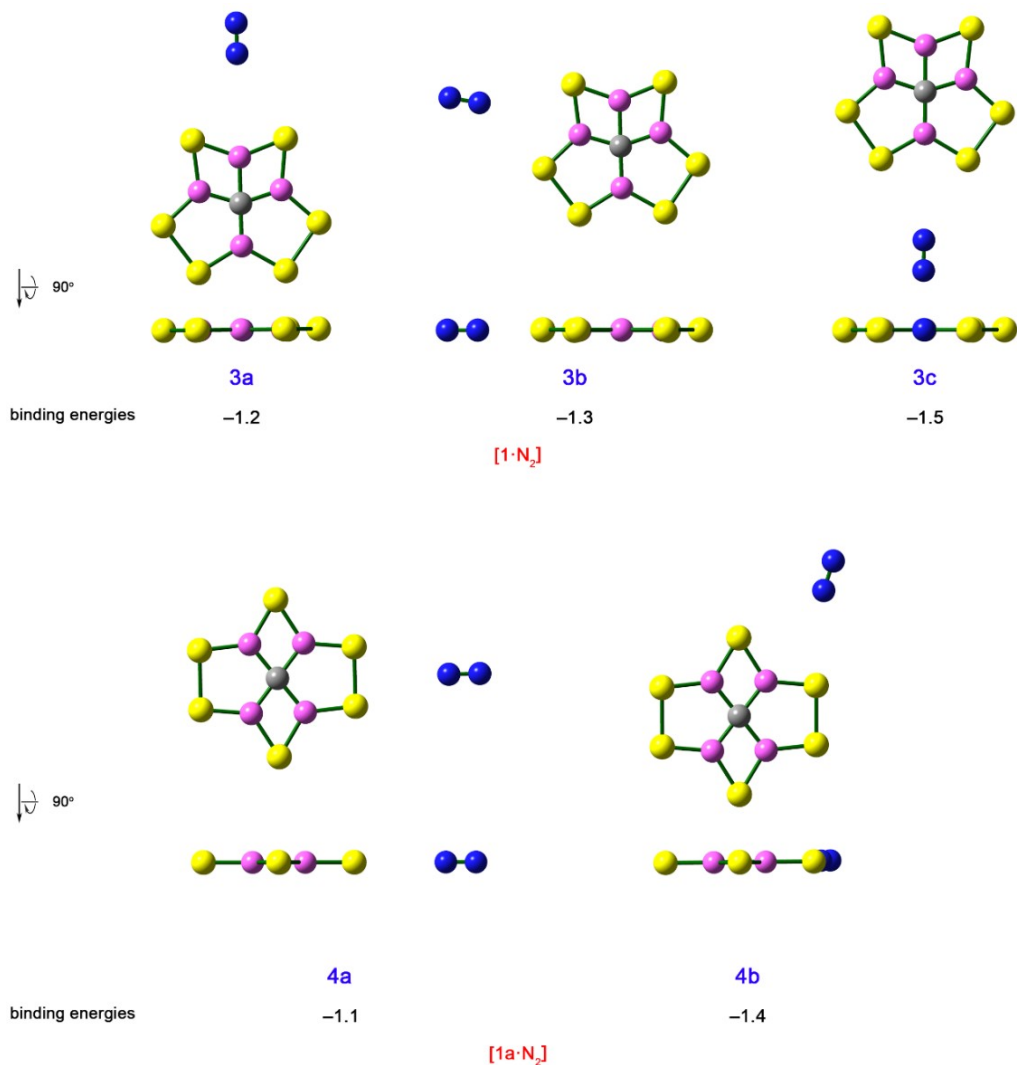

**Fig. S7** Optimized structures of  $[1 \cdot N_2]$  and  $[1a \cdot N_2]$  at the B2PLYP-D3(BJ)/aug-cc-pVTZ level and the corresponding binding energies.

Cartesian Coordinates for the structures.

Cartesian Coordinates of optimized structures shown in Fig. 1 and Fig S4 at the B2PLYP-D3(BJ)/aug-cc-pVTZ level.

**0**

|   |             |             |             |
|---|-------------|-------------|-------------|
| B | -0.97839500 | 0.97839500  | 0.32771600  |
| B | 0.97839500  | 0.97839500  | 0.32771600  |
| B | -0.97839500 | -0.97839500 | 0.32771600  |
| B | 0.97839500  | -0.97839500 | 0.32771600  |
| C | 0.00000000  | 0.00000000  | 1.03535000  |
| S | 0.00000000  | 2.44055400  | -0.19947500 |
| S | 2.44055400  | 0.00000000  | -0.19947500 |
| S | 0.00000000  | -2.44055400 | -0.19947500 |
| S | -2.44055400 | 0.00000000  | -0.19947500 |

**1**

|   |            |             |             |
|---|------------|-------------|-------------|
| C | 0.00000000 | 0.00000000  | 0.19154800  |
| B | 0.00000000 | 0.00000000  | 1.85277200  |
| B | 0.00000000 | 0.00000000  | -1.33459600 |
| B | 0.00000000 | 1.47643600  | 0.64927800  |
| B | 0.00000000 | -1.47643600 | 0.64927800  |
| S | 0.00000000 | -1.67021900 | 2.48376900  |
| S | 0.00000000 | -2.80282400 | -0.55012700 |
| S | 0.00000000 | -1.56640700 | -2.25342200 |
| S | 0.00000000 | 2.80282400  | -0.55012700 |
| S | 0.00000000 | 1.56640700  | -2.25342200 |
| S | 0.00000000 | 1.67021900  | 2.48376900  |

**1a**

|   |            |             |             |
|---|------------|-------------|-------------|
| C | 0.00000000 | 0.00000000  | 0.00000000  |
| B | 0.00000000 | 0.95858500  | 1.22779300  |
| B | 0.00000000 | -0.95858500 | -1.22779300 |
| B | 0.00000000 | 0.95858500  | -1.22779300 |
| B | 0.00000000 | -0.95858500 | 1.22779300  |
| S | 0.00000000 | 0.00000000  | 2.78385400  |
| S | 0.00000000 | 0.00000000  | -2.78385400 |
| S | 0.00000000 | 2.74502200  | 1.05449900  |
| S | 0.00000000 | 2.74502200  | -1.05449900 |
| S | 0.00000000 | -2.74502200 | 1.05449900  |
| S | 0.00000000 | -2.74502200 | -1.05449900 |

**1b**

|   |            |            |            |
|---|------------|------------|------------|
| C | 0.01611600 | 0.47078600 | 0.00000000 |
| B | 0.65742900 | 1.60483000 | 0.92064800 |

|   |             |             |             |
|---|-------------|-------------|-------------|
| B | -0.05776500 | -0.20581300 | -1.36157500 |
| B | -0.05776500 | -0.20581300 | 1.36157500  |
| B | 0.65742900  | 1.60483000  | -0.92064800 |
| S | 1.25351300  | 3.04686200  | 0.00000000  |
| S | 0.65742900  | 0.96436900  | -2.60930200 |
| S | -0.58224200 | -1.90135900 | -1.68759200 |
| S | -0.58224200 | -1.90135900 | 1.68759200  |
| S | -1.78472000 | -2.22381200 | 0.00000000  |
| S | 0.65742900  | 0.96436900  | 2.60930200  |

**1c**

|   |             |             |             |
|---|-------------|-------------|-------------|
| C | -0.79563600 | 0.01129600  | 0.00000000  |
| B | -0.36954200 | 0.69762900  | 1.30195900  |
| B | 0.16438700  | -1.27493800 | -1.04281700 |
| B | 0.16438700  | -1.27493800 | 1.04281700  |
| B | -0.36954200 | 0.69762900  | -1.30195900 |
| S | 0.16340200  | 2.40439100  | 1.06305500  |
| S | 0.16340200  | 2.40439100  | -1.06305500 |
| S | -0.01892300 | -0.44562400 | -2.67659900 |
| S | -1.43398200 | -1.69327100 | 0.00000000  |
| S | 1.57160900  | -1.86768100 | 0.00000000  |
| S | -0.01892300 | -0.44562400 | 2.67659900  |

**1d**

|   |             |             |             |
|---|-------------|-------------|-------------|
| C | 0.06485600  | 0.05871900  | 0.53689300  |
| B | -1.04741800 | 1.12180200  | 0.34306500  |
| B | 1.66322900  | -0.64262800 | 0.06832000  |
| B | -0.38083900 | -1.34572900 | -0.01510500 |
| B | 0.81814700  | 1.25180500  | -0.39527600 |
| S | -0.24548500 | 2.69289600  | -0.16070200 |
| S | 2.30592300  | 0.66462100  | -1.15613300 |
| S | 1.39102700  | -0.09726100 | 1.82769100  |
| S | -2.14788000 | -1.54072100 | -0.29815800 |
| S | 1.04433500  | -2.36424100 | -0.40381900 |
| S | -2.70134100 | 0.50229500  | -0.01052700 |

**1e**

|   |             |             |            |
|---|-------------|-------------|------------|
| C | 0.00000000  | 0.80107700  | 0.00000000 |
| B | -2.63857600 | 1.38074900  | 0.00000000 |
| B | 3.35858800  | -1.78080900 | 0.00000000 |
| B | -0.75544500 | -0.56834700 | 0.00000000 |
| B | 1.86207700  | -1.08241200 | 0.00000000 |
| S | -0.91955200 | 2.19346900  | 0.00000000 |
| S | 1.72454200  | 0.74734500  | 0.00000000 |

|   |             |             |            |
|---|-------------|-------------|------------|
| S | 0.33653900  | -2.03302800 | 0.00000000 |
| S | -4.01651700 | 2.37111500  | 0.00000000 |
| S | 4.82260700  | -2.45232900 | 0.00000000 |
| S | -2.51844500 | -0.48609600 | 0.00000000 |

**1f**

|   |             |             |             |
|---|-------------|-------------|-------------|
| C | 0.25868400  | 0.38340100  | 0.00000000  |
| B | 1.37362700  | 1.38421600  | 0.00000000  |
| B | -0.87692200 | 0.64102900  | 1.03223500  |
| B | -0.87692200 | 0.64102900  | -1.03223500 |
| B | 0.60633300  | -1.12025300 | 0.00000000  |
| S | 0.55277600  | -1.87145200 | -1.65733400 |
| S | -2.09670600 | 1.55736300  | 0.00000000  |
| S | -0.87692200 | -0.45247800 | -2.46599000 |
| S | 2.57732900  | 2.46359000  | 0.00000000  |
| S | 0.55277600  | -1.87145200 | 1.65733400  |
| S | -0.87692200 | -0.45247800 | 2.46599000  |

**1g**

|   |             |             |             |
|---|-------------|-------------|-------------|
| C | 0.71480500  | 0.32943700  | 0.00000000  |
| B | 0.39421100  | 1.84283700  | 0.00000000  |
| B | -0.20484300 | 0.38136100  | 1.28244000  |
| B | 2.00254000  | -0.41786400 | 0.00000000  |
| B | -0.20484300 | 0.38136100  | -1.28244000 |
| S | 3.40781600  | -1.22012600 | 0.00000000  |
| S | -1.04039600 | -2.14253300 | 0.00000000  |
| S | -0.20484300 | 2.17192700  | 1.71026700  |
| S | -0.20484300 | 2.17192700  | -1.71026700 |
| S | -1.42337200 | -0.89419500 | 1.65210400  |
| S | -1.42337200 | -0.89419500 | -1.65210400 |

**1h**

|   |             |             |            |
|---|-------------|-------------|------------|
| C | -1.58088200 | 0.92854700  | 0.00000000 |
| B | 2.51094000  | 2.06155600  | 0.00000000 |
| B | -0.70875000 | -1.61833400 | 0.00000000 |
| B | -0.69362400 | -3.27102100 | 0.00000000 |
| B | 0.00000000  | 0.95226400  | 0.00000000 |
| S | 0.81462800  | 2.57055500  | 0.00000000 |
| S | 0.83493700  | -0.64777100 | 0.00000000 |
| S | -2.26192700 | -0.71402200 | 0.00000000 |
| S | -0.68115700 | -4.88163200 | 0.00000000 |
| S | -2.53231900 | 2.25276600  | 0.00000000 |
| S | 4.07224200  | 1.65800400  | 0.00000000 |

**1i**

|   |             |             |            |
|---|-------------|-------------|------------|
| C | 0.00000000  | 0.29843800  | 0.00000000 |
| B | 1.12102400  | 1.35580800  | 0.00000000 |
| B | -3.15920100 | -0.33866700 | 0.00000000 |
| B | 2.33117900  | -1.02176100 | 0.00000000 |
| B | -1.11404400 | 1.38315300  | 0.00000000 |
| S | 0.00534700  | 2.84567900  | 0.00000000 |
| S | 3.33398600  | -2.39501800 | 0.00000000 |
| S | 2.79630700  | 0.81044200  | 0.00000000 |
| S | 0.43353300  | -1.28690800 | 0.00000000 |
| S | -2.92206700 | 1.41703000  | 0.00000000 |
| S | -3.39053000 | -1.93392900 | 0.00000000 |

Cartesian Coordinates of optimized structures shown in Fig. S3 at the B2PLYP-D3(BJ)/aug-cc-pVTZ level.

**1**

|   |            |             |             |
|---|------------|-------------|-------------|
| C | 0.00000000 | 0.00000000  | 0.19154800  |
| B | 0.00000000 | 0.00000000  | 1.85277200  |
| B | 0.00000000 | 0.00000000  | -1.33459600 |
| B | 0.00000000 | 1.47643600  | 0.64927800  |
| B | 0.00000000 | -1.47643600 | 0.64927800  |
| S | 0.00000000 | -1.67021900 | 2.48376900  |
| S | 0.00000000 | -2.80282400 | -0.55012700 |
| S | 0.00000000 | -1.56640700 | -2.25342200 |
| S | 0.00000000 | 2.80282400  | -0.55012700 |
| S | 0.00000000 | 1.56640700  | -2.25342200 |
| S | 0.00000000 | 1.67021900  | 2.48376900  |

**2a**

|   |            |             |             |
|---|------------|-------------|-------------|
| B | 0.00000000 | 0.00000000  | -1.84683100 |
| B | 0.00000000 | 1.53114100  | -0.70960500 |
| S | 0.00000000 | 1.67152500  | -2.53707500 |
| S | 0.00000000 | 2.79128300  | 0.57857800  |
| S | 0.00000000 | 1.50216400  | 2.23362000  |
| S | 0.00000000 | -2.79128300 | 0.57857800  |
| S | 0.00000000 | -1.50216400 | 2.23362000  |
| S | 0.00000000 | -1.67152500 | -2.53707500 |
| B | 0.00000000 | 0.00000000  | -0.11592900 |
| B | 0.00000000 | -1.53114100 | -0.70960500 |
| C | 0.00000000 | 0.00000000  | 1.35098100  |

**2b**

|   |             |             |            |
|---|-------------|-------------|------------|
| B | -1.42907800 | -1.28810200 | 0.00000000 |
|---|-------------|-------------|------------|

|   |             |             |            |
|---|-------------|-------------|------------|
| B | 1.01457500  | 1.07622900  | 0.00000000 |
| B | -1.57176600 | 0.45494100  | 0.00000000 |
| S | -3.06971600 | -0.64850500 | 0.00000000 |
| S | -1.65434900 | 2.24440100  | 0.00000000 |
| S | 0.39675500  | 2.76852400  | 0.00000000 |
| S | 2.40372900  | -1.53801700 | 0.00000000 |
| S | 2.75733000  | 0.54082900  | 0.00000000 |
| S | -0.47588500 | -2.83477300 | 0.00000000 |
| C | 0.70092000  | -1.47132400 | 0.00000000 |
| B | 0.00000000  | -0.18134700 | 0.00000000 |

**2c**

|   |             |             |             |
|---|-------------|-------------|-------------|
| B | -1.69379600 | -0.49357700 | -0.38655600 |
| S | -2.98880300 | 0.73373900  | -0.72595900 |
| S | -1.60774800 | -2.01531800 | 0.54278400  |
| S | 0.48930900  | -2.24492300 | 0.48329300  |
| S | 2.50123000  | 1.29623200  | 0.27484200  |
| S | 2.77223100  | -0.54557700 | -0.75115700 |
| S | -0.61181100 | 2.28831900  | 0.84395600  |
| B | -0.22852600 | 0.23596900  | -0.89330500 |
| B | 0.73223300  | 1.22501600  | 0.21890500  |
| C | -1.26967900 | 1.17938100  | -0.45278400 |
| B | 0.93959800  | -0.82257800 | -0.53253100 |

Cartesian Coordinates of optimized structures shown in Fig. S7 at the B2PLYP-D3(BJ)/aug-cc-pVTZ level.

**3a**

|   |            |             |             |
|---|------------|-------------|-------------|
| C | 0.00000000 | 0.00000000  | -0.43802600 |
| B | 0.00000000 | 0.00000000  | 1.22581000  |
| B | 0.00000000 | 0.00000000  | -1.96454600 |
| B | 0.00000000 | 1.47680800  | 0.02027200  |
| B | 0.00000000 | -1.47680800 | 0.02027200  |
| S | 0.00000000 | -1.67051900 | 1.85394700  |
| S | 0.00000000 | -2.80268700 | -1.18068000 |
| S | 0.00000000 | -1.56688200 | -2.88319600 |
| S | 0.00000000 | 2.80268700  | -1.18068000 |
| S | 0.00000000 | 1.56688200  | -2.88319600 |
| S | 0.00000000 | 1.67051900  | 1.85394700  |
| N | 0.00000000 | 0.00000000  | 4.93859500  |
| N | 0.00000000 | 0.00000000  | 6.03809800  |

**3b**

|   |             |             |            |
|---|-------------|-------------|------------|
| C | 0.00000000  | 0.57947900  | 0.00000000 |
| B | -1.66299900 | 0.54170600  | 0.00000000 |
| B | 1.52601000  | 0.62135400  | 0.00000000 |
| B | -0.49542400 | 2.04433000  | 0.00000000 |
| B | -0.41979600 | -0.90936600 | 0.00000000 |
| S | -2.24839200 | -1.14392100 | 0.00000000 |
| S | 0.81738600  | -2.20326400 | 0.00000000 |
| S | 2.48482800  | -0.92057100 | 0.00000000 |
| S | 0.66937900  | 3.40190600  | 0.00000000 |
| S | 2.40364700  | 2.21145900  | 0.00000000 |
| S | -2.33390200 | 2.19612900  | 0.00000000 |
| N | -1.76470600 | -5.65884700 | 0.00000000 |
| N | -1.58187700 | -4.57469500 | 0.00000000 |

**3c**

|   |            |             |             |
|---|------------|-------------|-------------|
| C | 0.00000000 | 0.00000000  | -0.77625400 |
| B | 0.00000000 | 0.00000000  | -2.44057700 |
| B | 0.00000000 | 0.00000000  | 0.75171100  |
| B | 0.00000000 | 1.47568500  | -1.23704200 |
| B | 0.00000000 | -1.47568500 | -1.23704200 |
| S | 0.00000000 | -1.66956400 | -3.07180600 |
| S | 0.00000000 | -2.80301000 | -0.03988000 |
| S | 0.00000000 | -1.57128600 | 1.66585700  |
| S | 0.00000000 | 2.80301000  | -0.03988000 |
| S | 0.00000000 | 1.57128600  | 1.66585700  |
| S | 0.00000000 | 1.66956400  | -3.07180600 |
| N | 0.00000000 | 0.00000000  | 4.57449200  |
| N | 0.00000000 | 0.00000000  | 5.67391200  |

**4a**

|   |             |             |             |
|---|-------------|-------------|-------------|
| C | 0.00000000  | 0.00000000  | -0.68397900 |
| B | 0.00016900  | 1.22708000  | 0.27643100  |
| B | 0.00000800  | -1.22838600 | -1.64141900 |
| B | -0.00016900 | -1.22708000 | 0.27643100  |
| B | -0.00000800 | 1.22838600  | -1.64141900 |
| S | 0.00020300  | 2.78384200  | -0.68232600 |
| S | -0.00020300 | -2.78384200 | -0.68232600 |
| S | 0.00014700  | 1.05395700  | 2.06290800  |
| S | -0.00014700 | -1.05395700 | 2.06290800  |
| S | 0.00000000  | 1.05410800  | -3.42867100 |
| S | 0.00000000  | -1.05410800 | -3.42867100 |
| N | 0.00000000  | 0.00000000  | 5.39975100  |
| N | 0.00000000  | 0.00000000  | 6.49919000  |

**4b**

|   |             |             |             |
|---|-------------|-------------|-------------|
| C | 0.59480100  | 0.10326500  | 0.00007300  |
| B | 0.84645900  | 1.64108000  | -0.00008800 |
| B | 0.35016000  | -1.43545000 | 0.00010600  |
| B | -0.95920200 | -0.02719800 | 0.00033300  |
| B | 2.14762300  | 0.23735700  | -0.00007600 |
| S | 2.63906200  | 1.99716100  | -0.00025100 |
| S | -1.44188100 | -1.78959500 | 0.00045100  |
| S | -0.49502400 | 2.83301900  | -0.00000300 |
| S | -2.04508800 | 1.40404800  | 0.00038600  |
| S | 3.23739800  | -1.18972700 | -0.00017600 |
| S | 1.69413100  | -2.62574100 | -0.00002800 |
| N | -4.70832800 | -0.68252400 | 0.00013700  |
| N | -5.70761100 | -1.14106800 | -0.00126100 |
